# Supplementary material for: An X-Linked Sex Ratio Distorter in Drosophila simulans That Kills or Incapacitates Both Noncarrier Sperm and Sons
Source: PubMed Central journal article supplement (PMC4199691; doi:10.1534/g3.114.013292), 2014-07-31
Supplement: supp_g3.114.013292_FigureS1.pdf [file supp_g3.114.013292_FigureS1.pdf]

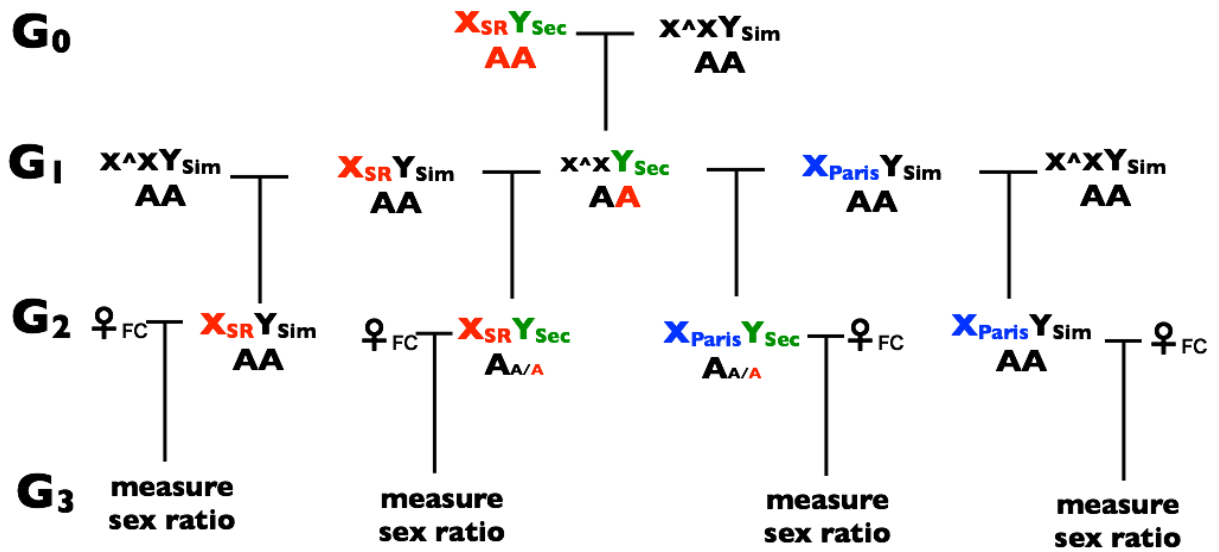

**Figure S1** Crosses done to examine the influence of a Y chromosome from *D. sechellia* ( $Y_{sec}$ ) on the expression of the SR and Paris sex ratio drivers. The symbol A denotes autosomes, X an X chromosome,  $Y_{sim}$  a Y chromosome from *D. simulans* and  $X^A X$  a compound X chromosome. Black symbols denote chromosomes from the compound-X line and Red symbols from the SR line.
