# Supplementary material for: An X-Linked Sex Ratio Distorter in Drosophila simulans That Kills or Incapacitates Both Noncarrier Sperm and Sons
Source: PubMed Central journal article supplement (PMC4199691; doi:10.1534/g3.114.013292), 2014-07-31
Supplement: supp_g3.114.013292_FigureS2.pdf [file supp_g3.114.013292_FigureS2.pdf]

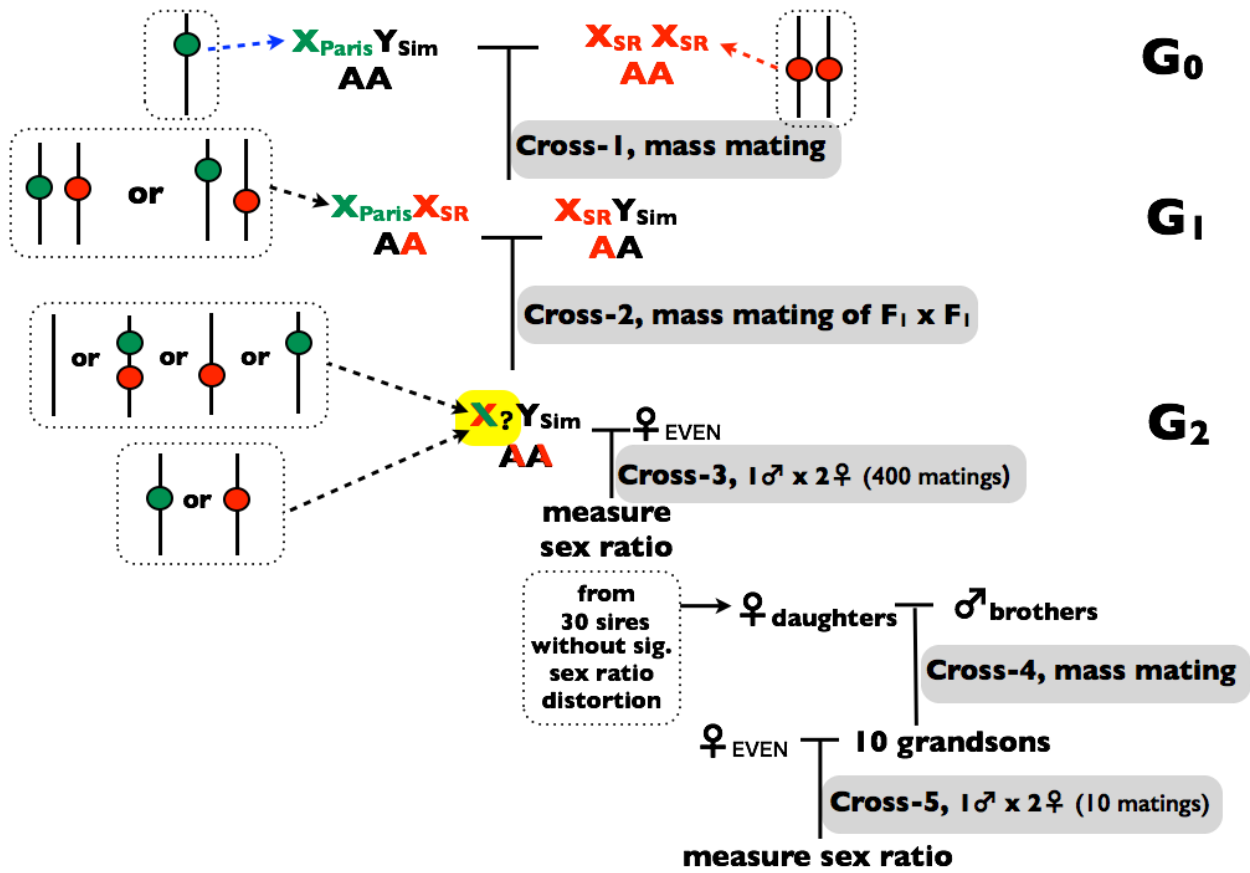

Figure S2 Crosses done to test for recombination between the Paris (green circles) and SR (red circles) sex ratio drivers.
